# Supplementary material for: Low-level viraemia among people living with HIV in Nigeria: a retrospective longitudinal cohort study
Source: PubMed Central journal article supplement — Lancet Glob Health. Author manuscript; Available in PMC 2022 Dec 1. (PMC9711923; doi:10.1016/s2214-109x(22)00413-2), 2022-12
Supplement: NIHMS1853100-supplement-Supplementary_material.pdf [file NIHMS1853100-supplement-Supplementary_material.pdf]

# THE LANCET

## Global Health

### Supplementary appendix

This appendix formed part of the original submission and has been peer reviewed. We post it as supplied by the authors.

Supplement to: Chun HM, Abutu A, Milligan K, et al. Low-level viraemia among people living with HIV in Nigeria: a retrospective longitudinal cohort study. *Lancet Glob Health* 2022; **10**: e1815–24.

## Table of Contents

**Table S1.** Analysis of Exclusions.

**Table S2.** Low-Level Viremia and Subsequent Virologic Non-Suppression or Virologic Failure.

**Table S3.** Prevalence of Virologic Suppression, Low-Level Viremia, and Virologic Non-Suppression at First Overall Viral Load  $\geq 24$  Weeks after ART Initiation.

**Table S4.** Proportion (%) of Patients in Each Low-Level Viremia Range Among All Patients with Results in the Low-Level Viremia Range 51–999 copies per mL.

**Figure S1.** Prevalence of Viral Load Ranges Less Than 1,000 Copies/mL as a Proportion of All Viral Loads Less Than 1,000 Copies/mL, by Calendar Year and Years on ART\*.

**Table S5.** Unadjusted and Adjusted Relative Risks of Low-Level Viremia Among Patients on First-Line ART.

**Table S6.** Adjusted Relative Risks of Virologic Non-Suppression and Virologic Failure Among Patients on First-Line ART, with Low-Level Viremia and INSTI Exposure Treated as Dichotomous Variables

**Table S7.** Viral Load Results Preceding Virologic Non-Suppression and Virologic Failure

**Table S8.** Unadjusted and Adjusted Relative Risks of Virologic Suppression and Virologic Failure Following Virologic Non-Suppression.

**Table S9.** Nigeria Low-Level Viremia Investigation Group

**Table S1. Analysis of Exclusions.**

| Variable | Unit             | Excluded*                | Included                  | P value |
|----------|------------------|--------------------------|---------------------------|---------|
| N        |                  | 88,837*                  | 402,668                   |         |
| Male sex | No. (% , 95% CI) | 32,839 (37.0, 36.6–37.3) | 129,620 (32.2, 32.0–32.3) | 0.059   |
| Age      | Median (IQR)     | 33 (28–40)               | 34 (28–41)                | 0.64    |
| State    | No. (% , 95% CI) |                          |                           | <0.0001 |
|          | Benue            | 11,144 (12.5, 12.3–12.8) | 100,569 (25.0, 24.8–25.1) |         |
|          | Delta            | 3,393 (3.8, 3.7–3.9)     | 14,906 (3.7, 3.6–3.8)     |         |
|          | Ekiti            | 243 (0.3, 0.2–0.3)       | 2,269 (0.6, 0.5–0.6)      |         |
|          | Enugu            | 5,490 (6.2, 6.0–6.3)     | 15,577 (3.9, 3.8–3.9)     |         |
|          | FCT              | 9,598 (10.8, 10.6–11.0)  | 32,964 (8.2, 8.1–8.3)     |         |
|          | Gombe            | 2,754 (3.1, 3.0–3.2)     | 11,251 (2.8, 2.7–2.8)     |         |
|          | Imo              | 6,562 (7.4, 7.2–7.6)     | 11,227 (2.8, 2.7–2.8)     |         |
|          | Kaduna           | 1,859 (2.1, 2.0–2.2)     | 22,759 (5.7, 5.6–5.7)     |         |
|          | Katsina          | 464 (0.5, 0.5–0.6)       | 4,686 (1.2, 1.1–1.2)      |         |
|          | Kogi             | 1,122 (1.3, 1.2–1.3)     | 8,256 (2.1, 2.0–2.1)      |         |
|          | Lagos            | 6,033 (6.8, 6.6–7.0)     | 30,994 (7.7, 7.6–7.8)     |         |
|          | Nasarawa         | 6,419 (7.2, 7.1–7.4)     | 25,047 (6.2, 6.1–6.3)     |         |
|          | Ogun             | 1,575 (1.8, 1.7–1.9)     | 10,713 (2.7, 2.6–2.7)     |         |
|          | Ondo             | 784 (0.9, 0.8–0.9)       | 6,651 (1.7, 1.6–1.7)      |         |
|          | Osun             | 508 (0.6, 0.5–0.6)       | 4,539 (1.1, 1.1–1.2)      |         |
|          | Oyo              | 1,688 (1.9, 1.8–2.0)     | 11,473 (2.8, 2.8–2.9)     |         |
|          | Plateau          | 2,125 (2.4, 2.3–2.5)     | 14,443 (3.6, 3.5–3.6)     |         |
|          | Rivers           | 27,076 (30.5, 30.2–30.8) | 74,344 (18.5, 18.3–18.6)  |         |

Demographic differences between included and excluded patients; age was analyzed using Wilcoxon rank-sum test

for clustered data. Categorical variables were analyzed using Rao-Scott  $\chi^2$  test.

\* Patients younger than 18 or older than 99 (n = 29,707) were not included due to exclusion based on age.

**Table S2. Low-Level Viremia and Subsequent Virologic Non-Suppression or Virologic Failure.**

|                        | ≥1 VL Result in Reference Range | ≥1 Subsequent VL after Reference Result | Subsequent Virologic Suppression ≤50 cp/mL | Subsequent Virologic Non-Suppression | ≥2 Subsequent VL after Reference Result | Subsequent Virologic Failure |
|------------------------|---------------------------------|-----------------------------------------|--------------------------------------------|--------------------------------------|-----------------------------------------|------------------------------|
| <b>Reference Range</b> |                                 |                                         |                                            |                                      |                                         |                              |
| ≤50 cp/mL              | 190,639 (96.4)                  | 175,626 (92.1)                          | 151,512 (86.3)                             | 13,894 (7.9)                         | 97,674 (51.2)                           | 1,426 (1.5)                  |
| LLV 51–999 cp/mL       | 69,405 (35.1)                   | 55,161 (79.5)                           | 43,436 (78.7)                              | 5,595 (10.1)                         | 29,958 (43.2)                           | 819 (2.7)                    |
| 51–199                 | 50,039 (25.3)                   | 38,410 (76.8)                           | 29,524 (76.9)                              | 3,282 (8.5)                          | 20,398 (40.8)                           | 430 (2.1)                    |
| 200–399                | 14,601 (7.4)                    | 10,989 (75.3)                           | 7,656 (69.7)                               | 1,091 (9.9)                          | 6,034 (41.3)                            | 171 (2.8)                    |
| 400–999                | 13,552 (6.9)                    | 10,261 (75.7)                           | 6,970 (67.9)                               | 1,287 (12.5)                         | 5,524 (40.8)                            | 219 (4.0)                    |
| ≥1,000 cp/mL           | 19,199 (9.7)                    | 11,399 (59.4)                           | 7,862 (69.0)                               | 2,232 (19.6)                         | --                                      | --                           |
| All Ranges             | --                              | 197,729                                 | --                                         | 19,199 (9.7)                         | 112,316 (56.8)                          | 2,232 (2.0)                  |

Virologic non-suppression defined as ≥1,000 cp/mL at the next VL result following the relevant VL result; VF

defined as two consecutive non-suppressed results following the relevant VL result. LLV=low-level viremia.

VF=virologic failure. cp/mL=copies/mL. VL=viral load.

**Table S3. Prevalence of Virologic Suppression, Low-Level Viremia, and Virologic Non-Suppression at First Viral Load  $\geq$ 24 Weeks after ART Initiation.**

| Age at ART initiation—yr                                           | Virologic Suppression $\leq$ 50 cp/mL, no. (%) | LLV 51–199 cp/mL, no. (%) | LLV 200–399 cp/mL, no. (%) | LLV 400–999 cp/mL, no. (%) | LLV 51–999 cp/mL, no. (%) | VLNS $\geq$ 1,000 cp/mL, no. (%) |
|--------------------------------------------------------------------|------------------------------------------------|---------------------------|----------------------------|----------------------------|---------------------------|----------------------------------|
| <b>First- and Second-Line ART: Males and Females (n = 402,668)</b> |                                                |                           |                            |                            |                           |                                  |
| Total                                                              | 292,137 (72.6)                                 | 40,830 (10.1)             | 11,767 (2.9)               | 11,883 (3.0)               | 64,480 (16.0)             | 46,051 (11.4)                    |
| <b>First-Line: Males and Females (n = 399,684, 99.3%)</b>          |                                                |                           |                            |                            |                           |                                  |
| 18-19 (n=7,065)                                                    | 4,953 (70.1)                                   | 704 (10.0)                | 205 (2.9)                  | 227 (3.2)                  | 1,136 (16.1)              | 976 (13.8)                       |
| 20-29 (n=116,524)                                                  | 86,279 (74.0)                                  | 10,716 (9.2)              | 3,144 (2.7)                | 3,328 (2.9)                | 17,188 (14.8)             | 13,057 (11.2)                    |
| 30-39 (n=150,320)                                                  | 109,391 (72.8)                                 | 14,771 (9.8)              | 4,332 (2.9)                | 4,352 (2.9)                | 23,455 (15.6)             | 17,474 (11.6)                    |
| 40-49 (n=81,842)                                                   | 58,547 (71.5)                                  | 9,007 (11.0)              | 2,520 (3.1)                | 2,469 (3.0)                | 13,996 (17.1)             | 9,299 (11.4)                     |
| 50-999 (n=43,933)                                                  | 31,271 (71.2)                                  | 5,240 (11.9)              | 1,445 (3.3)                | 1,372 (3.1)                | 8,057 (18.3)              | 4,605 (10.5)                     |
| Total (n=399,684)                                                  | 290,441 (72.7)                                 | 40,438 (10.1)             | 11,646 (2.9)               | 11,748 (2.9)               | 63,832 (16.0)             | 45,411 (11.4)                    |
| <b>First-line: Males (n = 128,633, 32.2%)</b>                      |                                                |                           |                            |                            |                           |                                  |
| 18-19 (n=1,959)                                                    | 1,416 (72.3)                                   | 225 (11.5)                | 52 (2.7)                   | 52 (2.7)                   | 329 (16.8)                | 214 (10.9)                       |
| 20-29 (n=28,504)                                                   | 21,696 (76.1)                                  | 2,741 (9.6)               | 709 (2.5)                  | 766 (2.7)                  | 4,216 (14.8)              | 2,592 (9.1)                      |
| 30-39 (n=45,688)                                                   | 32,460 (71.0)                                  | 5,202 (11.4)              | 1,437 (3.1)                | 1,381 (3.0)                | 8,020 (17.6)              | 5,208 (11.4)                     |
| 40-49 (n=34,165)                                                   | 23,712 (69.4)                                  | 4,155 (12.2)              | 1,111 (3.3)                | 1,037 (3.0)                | 6,303 (18.4)              | 4,150 (12.1)                     |
| 50-999 (n=18,317)                                                  | 12,622 (68.9)                                  | 2,368 (12.9)              | 650 (3.5)                  | 573 (3.1)                  | 3,591 (19.6)              | 2,104 (11.5)                     |
| Total (n=128,633)                                                  | 91,906 (71.4)                                  | 14,691 (11.4)             | 3,959 (3.1)                | 3,809 (3.0)                | 22,459 (17.5)             | 14,268 (11.1)                    |
| <b>First-line: Females (n=271,051, 67.8%)</b>                      |                                                |                           |                            |                            |                           |                                  |
| 18-19 (n=5,106)                                                    | 3,537 (69.3)                                   | 479 (9.4)                 | 153 (3.0)                  | 175 (3.4)                  | 807 (15.8)                | 762 (14.9)                       |
| 20-29 (n=88,020)                                                   | 64,583 (73.4)                                  | 7,975 (9.1)               | 2,435 (2.8)                | 2,562 (2.9)                | 12,972 (14.7)             | 10,465 (11.9)                    |
| 30-39 (n=104,632)                                                  | 76,931 (73.5)                                  | 9,569 (9.1)               | 2,895 (2.8)                | 2,971 (2.8)                | 15,435 (14.8)             | 12,266 (11.7)                    |
| 40-49 (n=47,677)                                                   | 34,835 (73.1)                                  | 4,852 (10.2)              | 1,409 (3.0)                | 1,432 (3.0)                | 7,693 (16.1)              | 5,149 (10.8)                     |
| 50-999 (n=25,616)                                                  | 18,649 (72.8)                                  | 2,872 (11.2)              | 795 (3.1)                  | 799 (3.1)                  | 4,466 (17.4)              | 2,501 (9.8)                      |
| Total (n=271,051)                                                  | 198,535 (73.2)                                 | 25,747 (9.5)              | 7,687 (2.8)                | 7,939 (2.9)                | 41,373 (15.3)             | 31,143 (11.5)                    |
| <b>Second-line: Males and Females (n=2,984, 0.7%)</b>              |                                                |                           |                            |                            |                           |                                  |
| 18-19 (n=58)                                                       | 31 (53.4)                                      | 6 (10.3)                  | 1 (1.7)                    | 2 (3.4)                    | 9 (15.5)                  | 18 (31.0)                        |
| 20-29 (n=437)                                                      | 242 (55.4)                                     | 57 (13.0)                 | 10 (2.3)                   | 21 (4.8)                   | 88 (20.1)                 | 107 (24.5)                       |
| 30-39 (n=1,088)                                                    | 597 (54.9)                                     | 137 (12.6)                | 51 (4.7)                   | 46 (4.2)                   | 234 (21.5)                | 257 (23.6)                       |
| 40-49 (n=895)                                                      | 514 (57.4)                                     | 117 (13.1)                | 37 (4.1)                   | 41 (4.6)                   | 195 (21.8)                | 186 (20.8)                       |
| 50-999 (n=506)                                                     | 312 (61.7)                                     | 75 (14.8)                 | 22 (4.3)                   | 25 (4.9)                   | 122 (24.1)                | 72 (14.2)                        |
| Total (n=2,984)                                                    | 1,696 (56.8)                                   | 392 (13.1)                | 121 (4.1)                  | 135 (4.5)                  | 648 (21.7)                | 640 (21.4)                       |
| <b>Second-line: Males (n=987, 33.1%)</b>                           |                                                |                           |                            |                            |                           |                                  |
| 18-19 (n=26)                                                       | 14 (53.8)                                      | 4 (15.4)                  | 0 (0.0)                    | 0 (0.0)                    | 4 (15.4)                  | 8 (30.8)                         |
| 20-29 (n=98)                                                       | 48 (49.0)                                      | 15 (15.3)                 | 2 (2.0)                    | 4 (4.1)                    | 21 (21.4)                 | 29 (29.6)                        |
| 30-39 (n=239)                                                      | 125 (52.3)                                     | 34 (14.2)                 | 7 (2.9)                    | 9 (3.8)                    | 50 (20.9)                 | 64 (26.8)                        |
| 40-49 (n=351)                                                      | 187 (53.3)                                     | 47 (13.4)                 | 17 (4.8)                   | 15 (4.3)                   | 79 (22.5)                 | 85 (24.2)                        |
| 50-999 (n=273)                                                     | 150 (54.9)                                     | 49 (17.9)                 | 14 (5.1)                   | 15 (5.5)                   | 78 (28.6)                 | 45 (16.5)                        |
| Total (n=987)                                                      | 524 (53.1)                                     | 149 (15.1)                | 40 (4.1)                   | 43 (4.4)                   | 232 (23.5)                | 231 (23.4)                       |
| <b>Second-line: Females (n=1,997, 66.9%)</b>                       |                                                |                           |                            |                            |                           |                                  |
| 18-19 (n=32)                                                       | 17 (53.1)                                      | 2 (6.2)                   | 1 (3.1)                    | 2 (6.2)                    | 5 (15.6)                  | 10 (31.2)                        |
| 20-29 (n=339)                                                      | 194 (57.2)                                     | 42 (12.4)                 | 8 (2.4)                    | 17 (5.0)                   | 67 (19.8)                 | 78 (23.0)                        |
| 30-39 (n=849)                                                      | 472 (55.6)                                     | 103 (12.1)                | 44 (5.2)                   | 37 (4.4)                   | 184 (21.7)                | 193 (22.7)                       |
| 40-49 (n=544)                                                      | 327 (60.1)                                     | 70 (12.9)                 | 20 (3.7)                   | 26 (4.8)                   | 116 (21.3)                | 101 (18.6)                       |
| 50-999 (n=233)                                                     | 162 (69.5)                                     | 26 (11.2)                 | 8 (3.4)                    | 10 (4.3)                   | 44 (18.9)                 | 27 (11.6)                        |
| Total (n=1,997)                                                    | 1,172 (58.7)                                   | 243 (12.2)                | 81 (4.1)                   | 92 (4.6)                   | 416 (20.8)                | 409 (20.5)                       |

First VL result on first- or second-line regimens  $\geq$ 24 weeks after ART initiation. ART=antiretroviral therapy. cp/mL=

copies/mL. LLV=low-level viremia. VS=virologic suppression. VLNS=virologic non-suppression.

**Table S4.** Proportion (%) of Patients in Each Low-Level Viremia Range Among All Patients with Results in the Low-Level Viremia Range 51–999 copies per mL.

|             | <b>51–199 copies/mL</b> | <b>200–399 copies/mL</b> | <b>400–999 copies/mL</b> |
|-------------|-------------------------|--------------------------|--------------------------|
| <b>2016</b> | 54.0                    | 25.1                     | 20.8                     |
| <b>2017</b> | 57.9                    | 22.6                     | 19.5                     |
| <b>2018</b> | 63.3                    | 18.7                     | 18.0                     |
| <b>2019</b> | 63.1                    | 18.6                     | 18.3                     |
| <b>2020</b> | 65.9                    | 17.0                     | 17.1                     |
| <b>2021</b> | 65.9                    | 17.3                     | 16.8                     |

cp/mL= copies/mL. LLV=low-level viremia.

**Figure S1. Viral Load Ranges Less Than 1,000 Copies/mL as a Proportion of All Viral Loads Less Than 1,000 Copies/mL, by Calendar Year and Years on ART\*.**

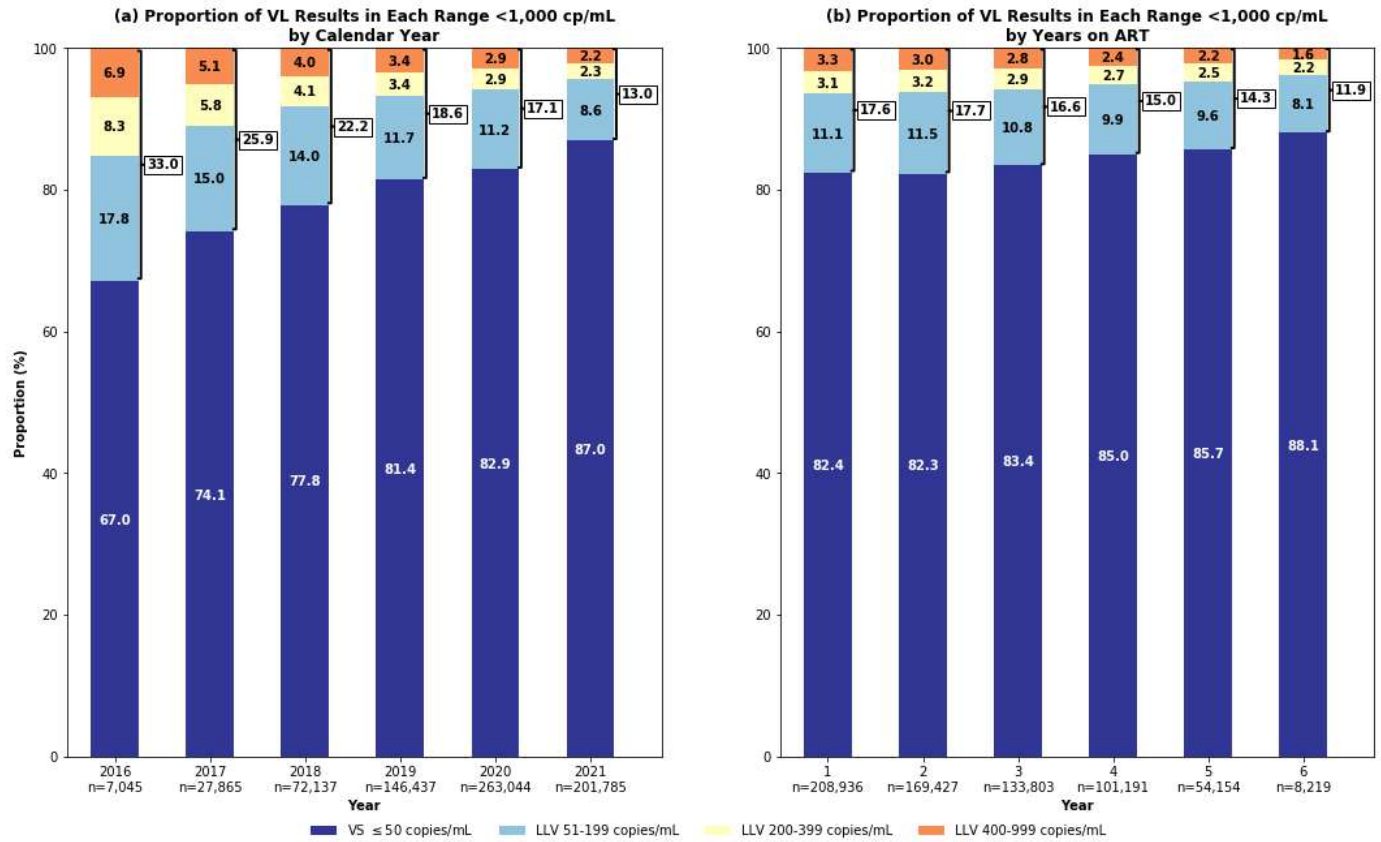

ART=antiretroviral therapy. cp/mL= copies/mL. LLV=low-level viremia. VS=virologic suppression.

\* Proportions were calculated using the first VL result of every year in order to avoid bias from repeated measurements within 1 year.

**Table S5. Unadjusted and Adjusted Relative Risks of Low-Level Viremia Among Patients on First-Line ART.**

|                                                 | Log-binomial regression   |         |                         |         |
|-------------------------------------------------|---------------------------|---------|-------------------------|---------|
|                                                 | Unadjusted RR<br>(95% CI) | P value | Adjusted RR<br>(95% CI) | P value |
| <b>Sex: male</b>                                | 1.12 (1.06–<br>1.19)      | 0.0002  | 1.14 (1.10–<br>1.18)    | <0.0001 |
| <b>Age at ART initiation</b>                    |                           |         |                         |         |
| <b>18–19</b>                                    | 0.89 (0.81–<br>0.97)      | 0.0094  | 0.93 (0.86–<br>1.00)    | 0.063   |
| <b>20–29</b>                                    | 0.87 (0.83–<br>0.91)      | <0.0001 | 0.90 (0.86–<br>0.93)    | <0.0001 |
| <b>30–39</b>                                    | 0.92 (0.89–<br>0.95)      | <0.0001 | 0.93 (0.90–<br>0.96)    | <0.0001 |
| <b>40–49</b>                                    | 0.98 (0.96–<br>1.01)      | 0.11    | 0.98 (0.96–<br>1.00)    | 0.062   |
| <b>≥50</b>                                      | ref                       |         | ref                     |         |
| <b>Initiated on DTG-based ART</b>               | 0.78 (0.74–<br>0.83)      | <0.0001 | 0.83 (0.80–<br>0.87)    | <0.0001 |
| <b>Time on ART, years</b>                       | 1.10 (1.08–<br>1.13)      | <0.0001 | 1.07 (1.06–<br>1.09)    | <0.0001 |
| <b>First VL ≥12 months after ART initiation</b> | 0.97 (0.92–<br>1.03)      | 0.31    | --                      | --      |
| <b>Documented dispense ratio ≥51%</b>           | 0.97 (0.94–<br>0.99)      | 0.022   | 1.03 (0.99–<br>1.05)    | 0.065   |

Log-binomial regression analysis, unadjusted and adjusted relative risks. Confidence intervals were calculated with cluster-robust standard errors to account for clustering at the facility level.

ART=antiretroviral therapy. cp/mL= copies/mL. CI=confidence interval. RR= relative risk. LLV=low-level viremia.

VS=virologic suppression. VLNS=virologic non-suppression.



**Table S6. Adjusted Relative Risks of Virologic Non-Suppression and Virologic Failure Among Patients on First-Line ART, with LLV and INSTI Exposure Treated as Dichotomous Variables.**

| Variable                                 | Virologic Non-Suppression |         | Virologic Failure    |         |
|------------------------------------------|---------------------------|---------|----------------------|---------|
|                                          | Adjusted RR (95% CI)      | P value | Adjusted RR (95% CI) | P value |
| Male sex                                 | 1.05 (1.01–1.10)          | 0.041   | 1.07 (0.97–1.19)     | 0.18    |
| Age at ART initiation - yr               |                           |         |                      |         |
| 18–19                                    | 1.29 (1.14–1.46)          | <0.0001 | 1.71 (1.23–2.38)     | 0.0014  |
| 20–29                                    | 1.17 (1.09–1.25)          | <0.0001 | 1.30 (1.10–1.55)     | 0.0024  |
| 30–39                                    | 1.13 (1.06–1.19)          | <0.0001 | 1.22 (1.04–1.42)     | 0.013   |
| 40–49                                    | 1.04 (0.98–1.10)          | 0.17    | 1.05 (0.91–1.22)     | 0.50    |
| ≥50                                      | ref                       | --      |                      |         |
| Time on ART - yr                         | 1.30 (1.26–1.34)          | <0.0001 | 1.22 (1.14–1.30)     | <0.0001 |
| First VL ≥12 months after ART initiation | 0.70 (0.67–0.74)          | <0.0001 | 0.67 (0.59–0.76)     | <0.0001 |
| Documented dispense ratio ≥51%           | --                        | --      | 0.85 (0.74–0.96)     | 0.012   |
| INSTI exposure (cumulative)              | 0.73 (0.68–0.79)          | <0.0001 | 0.40 (0.35–0.47)     | <0.0001 |
| LLV (51–999 cp/mL) at first VL result    | 1.61 (1.55–1.67)          | <0.0001 | 2.20 (1.98–2.43)     | <0.0001 |

Log-binomial analysis and adjusted relative risks using first on-treatment viral load after at least 24 weeks of ART.

Confidence intervals were calculated using cluster-robust standard errors to account for clustering at the facility level. Only patients with 3 or more VL measurements (n=112,316) were included in analysis of virologic failure, defined as 2 consecutive VL results ≥1,000 cp/mL.

**Table S7. Viral Load Results Preceding Virologic Non-Suppression and Virologic Failure**

|                                   | Range of Preceding Viral Load Result*    |                           |                            |                           |                           |
|-----------------------------------|------------------------------------------|---------------------------|----------------------------|---------------------------|---------------------------|
|                                   | Virologic Suppression ≤50 cp/mL, no. (%) | LLV 51–199 cp/mL, no. (%) | LLV 200–399 cp/mL, no. (%) | LLV 400–999 cp/mL, no.(%) | LLV 51–999 cp/mL, no. (%) |
| Experienced VLNS (n=19,199, 9.7%) | 13,752 (71.6)                            | 3,172 (16.5)              | 1,040 (5.4)                | 1,235 (6.4)               | 5,447 (28.4)              |
| Experienced VF (n=2,232, 2.0%)    | 1,419 (63.6)                             | 425 (19.0)                | 169 (7.6)                  | 219 (9.8)                 | 813 (36.4)                |

Analysis of virologic non-suppression included all patients who met outcomes analysis inclusion criteria

(n=197,729); analysis of virologic failure only included patients who met these criteria and who had ≥3 VL results

(n=112,316).

LLV=low-level viremia. VLNS= virologic non-suppression. VF= virologic failure. cp/mL=copies/mL.

\*For patients who experienced virologic failure, the VL result shown is that preceding the first of the two non-suppressed measurements

**Table S8. Unadjusted and Adjusted Relative Risks of Virologic Suppression and Virologic Failure Following Virologic Non-Suppression.**

|                                                 | Virologic Suppression ≤50 cp/mL<br>(n=7,862) |         |                      |         | Virologic Failure<br>(n=2,232) |         |                      |         |
|-------------------------------------------------|----------------------------------------------|---------|----------------------|---------|--------------------------------|---------|----------------------|---------|
|                                                 | Unadjusted RR (95% CI)                       | P value | Adjusted RR (95% CI) | P value | Unadjusted RR (95% CI)         | P value | Adjusted RR (95% CI) | P value |
| <b>Sex: male</b>                                | 0.93 (0.90–0.97)                             | 0.0005  | 0.94 (0.91–0.98)     | 0.0028  | 1.04 (0.95–1.13)               | 0.40    | --                   | --      |
| <b>Age at ART initiation - yr</b>               |                                              |         |                      |         |                                |         |                      |         |
| <b>18–19</b>                                    | 0.99 (0.87–1.12)                             | 0.84    | --                   | --      | 1.37 (1.05–1.78)               | 0.019   | 1.37 (1.05–1.78)     | 0.021   |
| <b>20–29</b>                                    | 1.02 (0.96–1.08)                             | 0.56    | --                   | --      | 1.08 (0.94–1.24)               | 0.27    | 1.07 (0.93–1.23)     | 0.34    |
| <b>30–39</b>                                    | 1.00 (0.95–1.06)                             | 0.99    | --                   | --      | 1.06 (0.93–1.21)               | 0.40    | 1.05 (0.92–1.20)     | 0.49    |
| <b>40–49</b>                                    | 1.02 (0.97–1.08)                             | 0.46    | --                   | --      | 0.98 (0.85–1.12)               | 0.77    | 0.97 (0.84–1.11)     | 0.66    |
| <b>≥50</b>                                      | ref                                          | --      | --                   | --      | ref                            | --      | ref                  | --      |
| <b>Time on ART - yr</b>                         | 1.00 (0.98–1.01)                             | 0.68    | --                   | --      | 1.02 (0.98–1.06)               | 0.35    | --                   | --      |
| <b>First VL ≥12 months after ART initiation</b> | 1.05 (1.02–1.09)                             | 0.0033  | 1.03 (1.00–1.07)     | 0.045   | 0.92 (0.85–1.00)               | 0.056   | 0.93 (0.85–1.01)     | 0.085   |
| <b>Documented dispense ratio ≥51%</b>           | 1.02 (0.99–1.06)                             | 0.22    | --                   | --      | 0.89 (0.81–0.99)               | 0.028   | 0.92 (0.84–1.02)     | 0.10    |
| <b>On DTG-based ART at time of VLNS</b>         | 1.12 (1.08–1.16)                             | <0.0001 | 1.11 (1.07–1.14)     | <0.0001 | 0.75 (0.68–0.82)               | <0.0001 | 0.76 (0.70–0.83)     | <0.0001 |
| <b>LLV 51–999 at first VL</b>                   | 0.82 (0.79–0.85)                             | <0.0001 | 0.83 (0.80–0.86)     | <0.0001 | 1.34 (1.22–1.47)               | <0.0001 | 1.32 (1.21–1.44)     | <0.0001 |

Factors associated with virologic suppression ≤50 cp/mL and virologic failure following an episode of virologic non-suppression, patients with ≥1 VL after VLNS result only (n=11,399).

VL=viral load. INSTI=integrase strand transfer inhibitor. LLV=low-level viremia. VLNS=virologic non-suppression.

cp/mL=copies/mL. RR=relative risk.

**Table S9. Nigeria Low-Level Viremia Investigation Group**

| Co-author name, highest degree  | Affiliation                                                                                                                                                                      |
|---------------------------------|----------------------------------------------------------------------------------------------------------------------------------------------------------------------------------|
| Uzoma Ene, MD                   | Division of Global HIV/TB, Center for Global Health, Abuja, Federal Capital Territory (FCT) Nigeria                                                                              |
| Chibuzor Onyenuobi, MD          | Division of Global HIV/TB, Center for Global Health, Abuja, FCT Nigeria                                                                                                          |
| Timothy Efuntoye, MD            | Division of Global HIV/TB, Center for Global Health, Abuja, FCT Nigeria                                                                                                          |
| Chidozie Meribe, MD             | Division of Global HIV/TB, Center for Global Health, Abuja, FCT Nigeria                                                                                                          |
| Obinna Ogbanufe, MD             | Division of Global HIV/TB, Center for Global Health, Abuja, FCT Nigeria                                                                                                          |
| Orji Bassey, MSc                | Division of Global HIV/TB, Center for Global Health, Abuja, FCT Nigeria                                                                                                          |
| Omodele J Fagbamigbe, MD        | Division of Global HIV/TB, Center for Global Health, Abuja, FCT Nigeria                                                                                                          |
| Ayodele Fagbemi, MPH            | Division of Global HIV/TB, Center for Global Health, Abuja, FCT Nigeria                                                                                                          |
| Moyosola Bamidele, PhD          | Division of Global HIV/TB, Center for Global Health, Abuja, FCT Nigeria                                                                                                          |
| Israel Audu, MSc                | Division of Global HIV/TB, Center for Global Health, Abuja, FCT Nigeria                                                                                                          |
| Dickson Adegoke, MSc            | Division of Global HIV/TB, Center for Global Health, Abuja, FCT Nigeria                                                                                                          |
| Jelpe Tapdiyel, MSc             | Division of Global HIV/TB, Center for Global Health, Abuja, FCT Nigeria                                                                                                          |
| Anuri Emeh, MD                  | Division of Global HIV/TB, Center for Global Health, Abuja, FCT Nigeria                                                                                                          |
| Christopher Obanubi, MD         | Division of Global HIV/TB, Center for Global Health, Abuja, FCT Nigeria                                                                                                          |
| Odafrenkhoa Oke, MSc            | Division of Global HIV/TB, Center for Global Health, Abuja, FCT Nigeria                                                                                                          |
| Sherri Pals, PhD                | Division of Global HIV/TB, Center for Global Health, Atlanta Georgia USA                                                                                                         |
| Andrew T Boyd, MD               | Division of Global Health Protection, Center for Global Health Atlanta, Georgia USA                                                                                              |
| Clement Zeh, PhD                | Division of Global HIV/TB, Center for Global Health, Atlanta Georgia USA                                                                                                         |
| Dennis Ellenberger, PhD         | Division of Global HIV/TB, Center for Global Health, Atlanta Georgia USA                                                                                                         |
| Michelle Williams-Sherlock, MPH | Division of Global HIV/TB, Center for Global Health, Atlanta Georgia USA                                                                                                         |
| Sylvia Adebajo, MD              | Center for International Health, Education, and Biosecurity, Maryland Global Initiatives Corporation - an affiliate of the University of Maryland Baltimore, Abuja, FCT, Nigeria |
| Uba Sabo, PhD                   | National AIDS/STIs Control Programme (NASCP), Federal Ministry of Health, Abuja, FCT, Nigeria                                                                                    |
| Eruona Etubi, BMLS              | National AIDS/STIs Control Programme (NASCP), Federal Ministry of Health, Abuja, FCT, Nigeria                                                                                    |
| Temiwoluwa Omole, MD            | Clinical services department, APIN Public Health Initiatives, Abuja, FCT, Nigeria                                                                                                |
| Prosper Okonkwo, MD             | Prevention, Care and Treatment Department, Institute of Human Virology, Abuja, FCT, Nigeria                                                                                      |
| Temitope Kolade, MD             | Prevention, Care and Treatment Department, Institute of Human Virology, Abuja, FCT, Nigeria                                                                                      |
| Patrick Dakum, MD               | Department of Epidemiology & Public Health, University of Maryland School of Medicine, Baltimore, Maryland, USA                                                                  |
| Olayiwola Olanrewaju, MD        | Clinical Services-Care and Treatment, Catholic Caritas Foundation of Nigeria, Abuja, FCT, Nigeria                                                                                |
| John O Oko, MD                  | Health & HIV Division, Catholic Caritas Foundation of Nigeria, Abuja, FCT, Nigeria                                                                                               |
| Inyang Ayo, MD                  | Clinical Service Unit, Centre for Integrated Health Programs, Abuja, FCT, Nigeria                                                                                                |

|                        |                                                                                                                                                                                  |
|------------------------|----------------------------------------------------------------------------------------------------------------------------------------------------------------------------------|
| Bolanle Oyeledun, MD   | Program Management, Centre for Integrated Health Programs, Abuja, FCT, Nigeria                                                                                                   |
| Deborah Odoh, MD       | National AIDS/STIs Control Programme (NASCP), Federal Ministry of Health, Abuja, FCT, Nigeria                                                                                    |
| Oluwasanmi Adeokun, MD | Center for International Health, Education, and Biosecurity, Maryland Global Initiatives Corporation - an affiliate of the University of Maryland Baltimore, Abuja, FCT, Nigeria |
| Grace Bassey, MSc      | National AIDS/STIs Control Programme (NASCP), Federal Ministry of Health, Abuja, FCT, Nigeria                                                                                    |
